# Supplementary material for: Stabilisation and controlled release of silibinin from pH responsive shellac colloidal particles
Source: Royal Society of Chemistry journal article supplement (doi:10.1039/c1sm05853c), 2011-01-01
Supplement: c1sm05853c.pdf [file c1sm05853c.pdf]

**Supplementary data (Figure S1 and S2)**

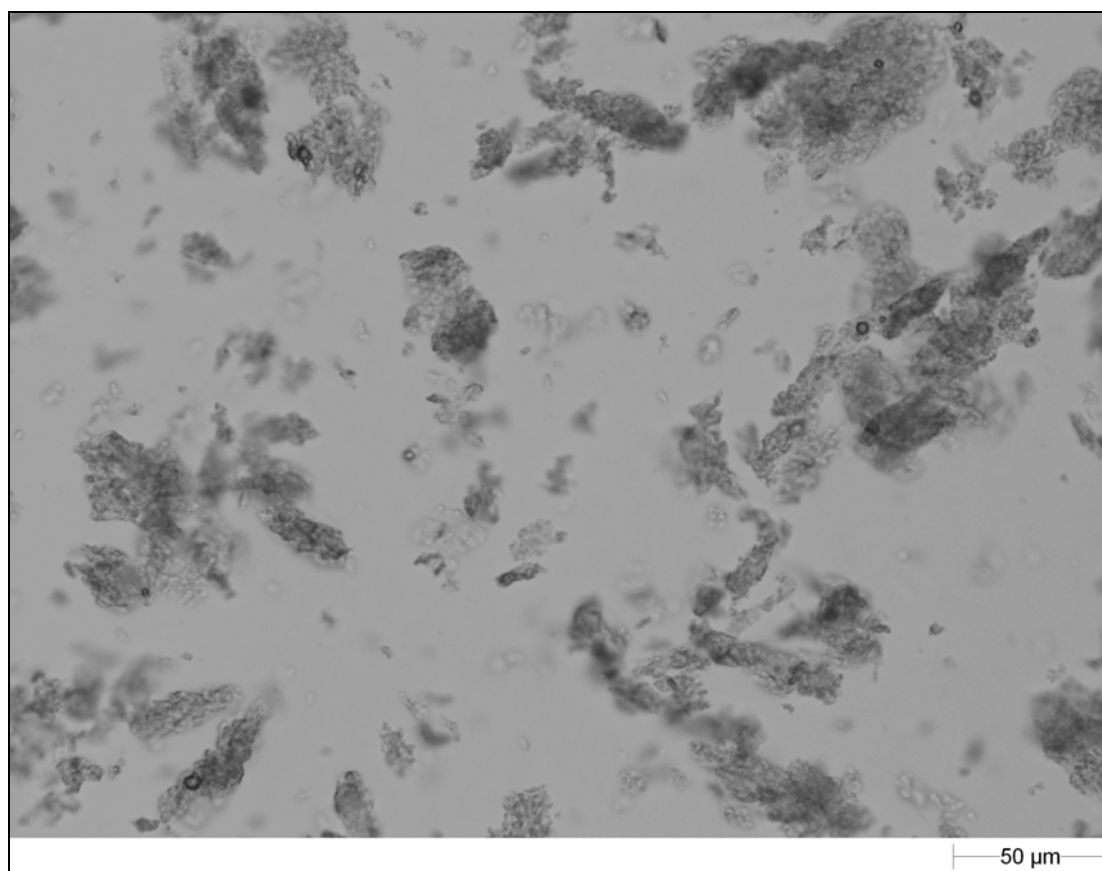

**Figure S1:** Microscopic colloidal aggregates formed due to the high concentration of shellac in the stock solution (>10% w/w).

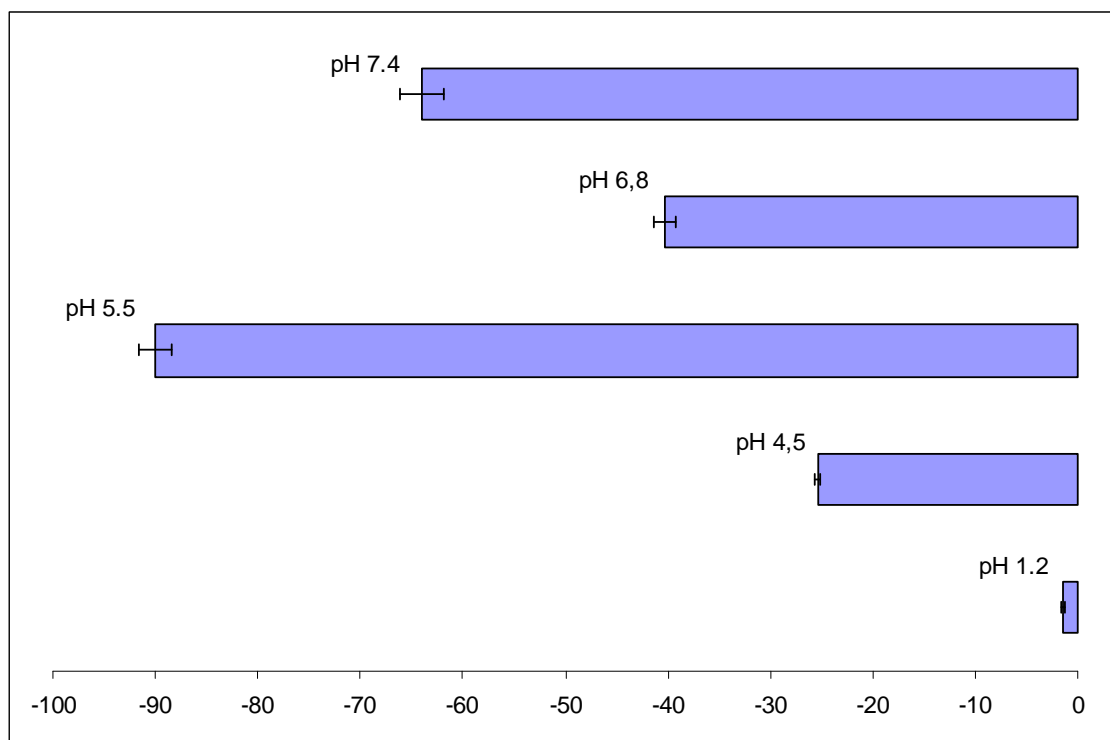

**Figure S2:** Zeta potential values of polymer (xanthan gum) stabilised colloidal particles at different pH values. The almost complete disappearance of surface charge at pH 1.2 indicated the role of steric stabilization due to the presence of xanthan gum on the surface of the particles.
